# Supplementary material for: Multilamellar nanovectors composed of microbial glycolipid–polylysine complexes for drug encapsulation
Source: Royal Society of Chemistry journal article supplement (doi:10.1039/d4pm00163j), 2024-01-01
Supplement: d4pm00163j1.pdf [file d4pm00163j1.pdf]

## Supporting Information

### **Multilamellar Nanovectors composed of Microbial Glycolipid-Polylysine Complexes for Drug Encapsulation**

Silvia Alonso-de-Castro<sup>a</sup>, Sergio Oliveira Formoso<sup>a</sup>, Chloé Seyrig<sup>a</sup>, Korin Ozkaya<sup>a</sup>, Julien Dumont<sup>b</sup>, Luisa Riancho<sup>c</sup>, Javier Perez<sup>d</sup>, Christophe Héлары<sup>a,\*</sup>, Niki Baccile<sup>a,\*</sup>

<sup>a</sup> Sorbonne Université, Centre National de la Recherche Scientifique, Laboratoire de Chimie de la Matière Condensée de Paris, LCMCP, F-75005 Paris, France

<sup>b</sup> Centre interdisciplinaire de recherche biologique, Collège de France, 75005 Paris, France

<sup>c</sup> Centre de Recherche INSTITUT DE LA VISION, UMR\_S968 Inserm / UPMC / CHNO des Quinze-Vingts, 75012, Paris, France

<sup>d</sup> Synchrotron Soleil, L'Orme des Merisiers, Saint-Aubin, BP48, 91192 Gif-sur-Yvette Cedex, France

$^1\text{H NMR}$

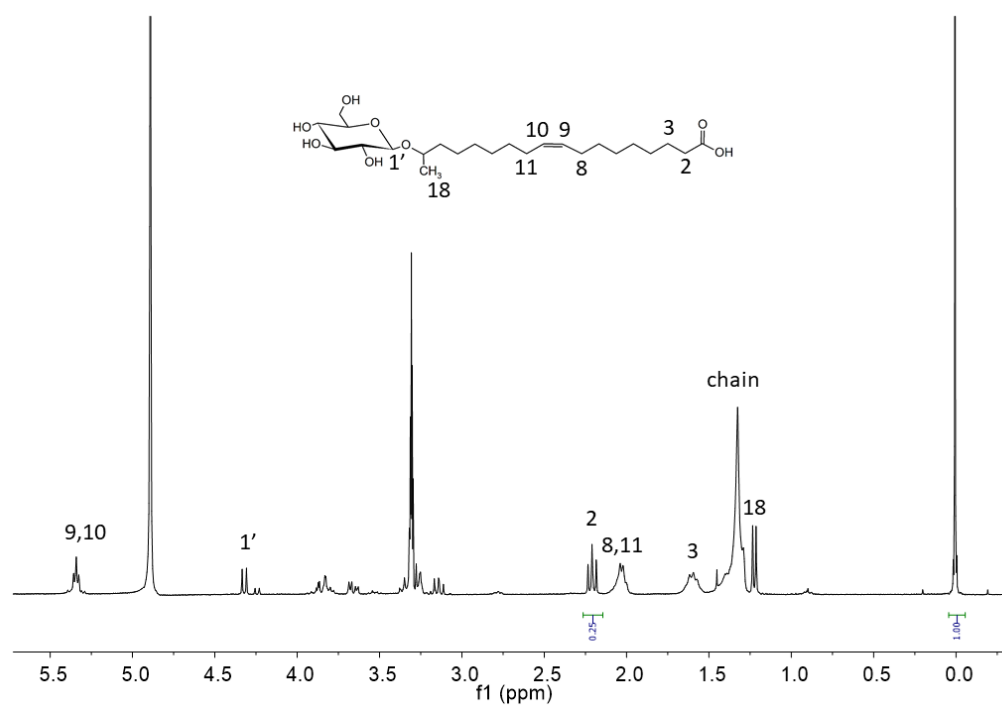

Figure S1.  $^1\text{H NMR}$  of control GC in methanol- $d_4$ .

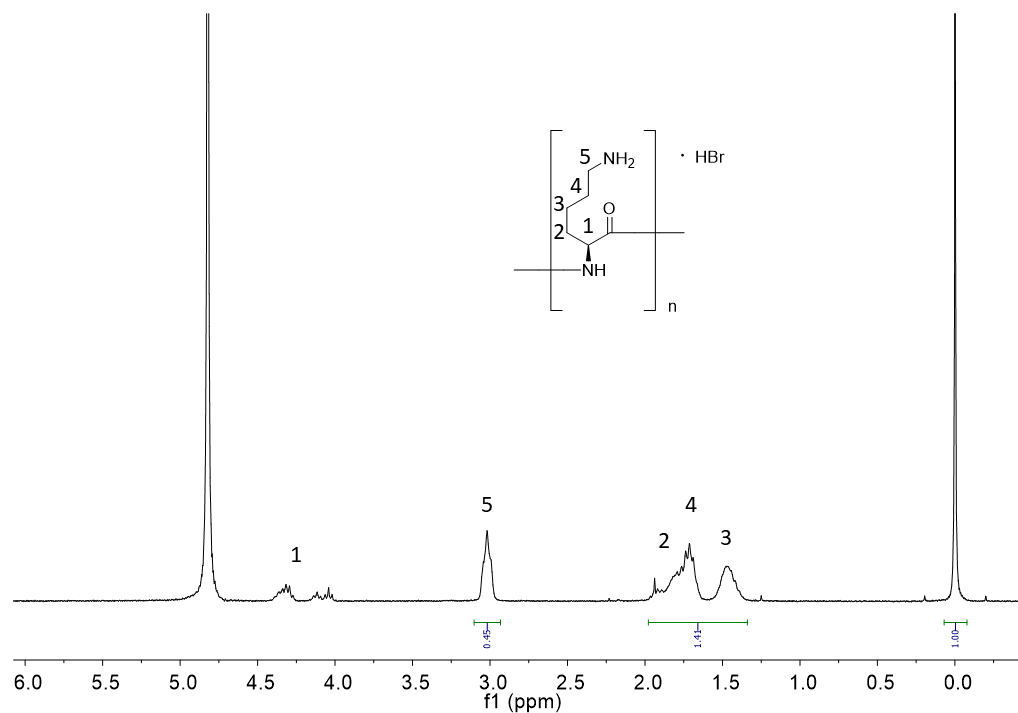

Figure S2.  $^1\text{H NMR}$  of control PLL in  $\text{D}_2\text{O}$ .

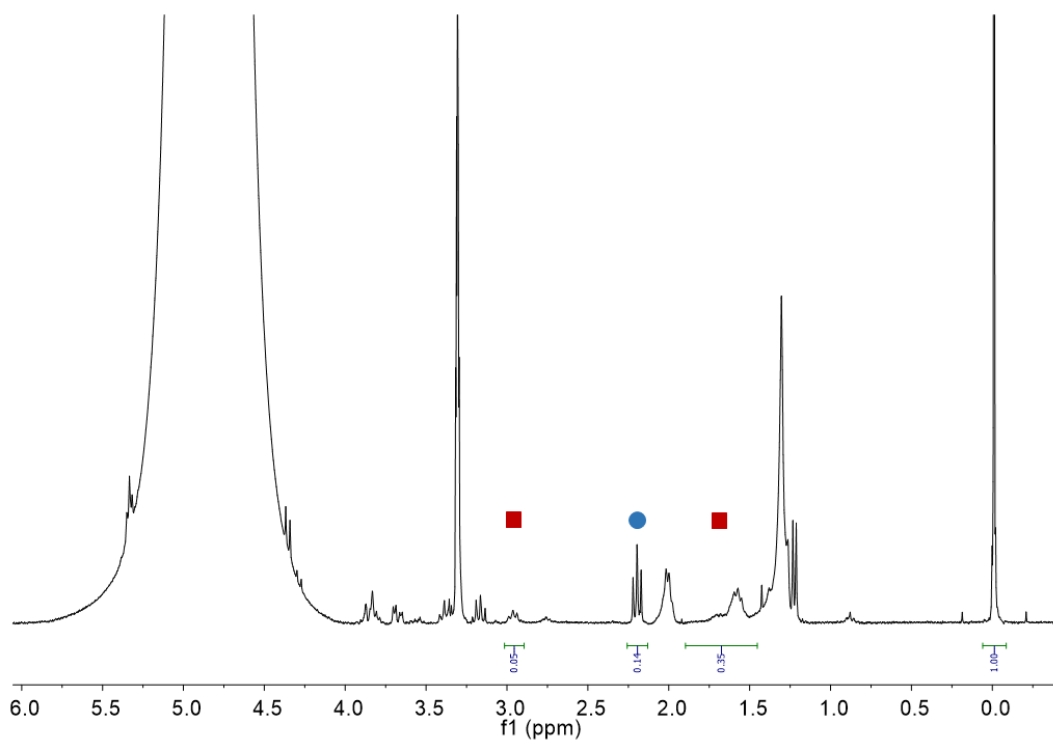

**Figure S3.**  $^1\text{H}$  NMR from sample GCPLL in  $\text{H}_2\text{O}$ , centrifuged pellet and dissolved in methanol- $d_4$ , where peaks assigned with ■ and ● correspond to PLL and GC, respectively.

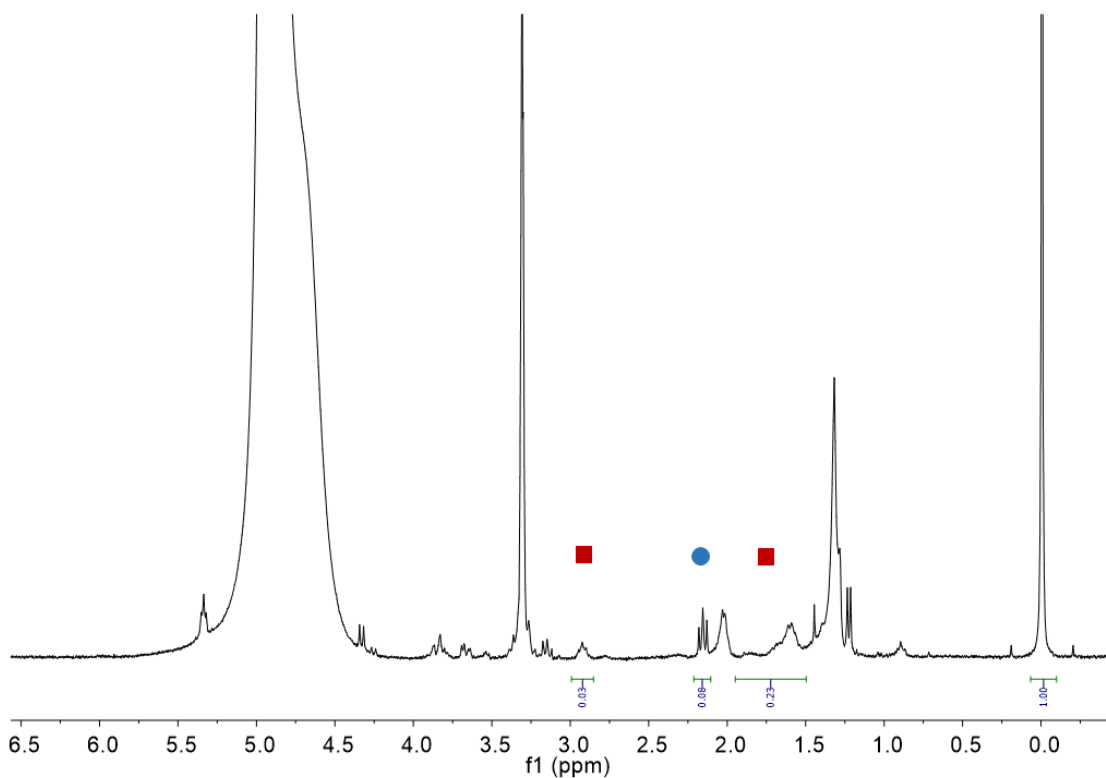

**Figure S4**  $^1\text{H}$  NMR from sample GCPLL in DMEM, centrifuged and dissolved in methanol- $d_4$ , where peaks assigned with ■ and ● correspond to PLL and GC, respectively.

Table S1. Quantitative analysis of the integrals corresponding to the  $^1\text{H}$  NMR spectra of the GCPLL prepared in  $\text{H}_2\text{O}$  (pH 5) and DMEM cell culture media (pH 7.5) and the resulting pellet dissolved in  $\text{MeOD-d}_4$ , shown in Figures S1-4. PLL is represented by the  $(\text{RCH}_2\text{NH}_2)_x$  (where  $x \sim 20$ ) peak at  $\delta = 2.8$  ppm. The  $M_w$  (PLL)  $\approx 1\text{-}5$  kDa, then we consider an average  $M_w$  (PLL) = 2.5 kDa, whereas the  $M_w$  of each monomer is 128 g/mol, yielding an average of 20 monomers per PLL chain. The valence of the  $(\text{RCH}_2\text{NH}_2)_x$  ( $x \sim 20$ ) peak is then taken as 40. G-C18:1 is represented by the  $\text{RCH}_2\text{C}=\text{O}$  peak at  $\delta = 2.2$  ppm. The  $M_w$  (G-C18:1) = 460 g/mol and each G-C18:1 bears a single COOH group. The valence of the  $\text{RCH}_2\text{C}=\text{O}$  peak is then taken as 2. The peak at  $\delta = 0$  ppm corresponds to the reference (TMSP- $d_4$ , 1 mg.mL $^{-1}$   $\equiv$  5.8mM), having a valence of 9. Subscripts: in= initial; f: final.

|                      | Integrals |           |                  | $C_{\text{in}}$ (mM)      |                            | $C_{\text{f}}$ (mM)      |                           | $C_{\text{f}}/C_{\text{in}}$ (%) |                            | Molar ratio                                    |                                              | Functional group              |
|----------------------|-----------|-----------|------------------|---------------------------|----------------------------|--------------------------|---------------------------|----------------------------------|----------------------------|------------------------------------------------|----------------------------------------------|-------------------------------|
|                      | GC (2H)   | PLL (40H) | TMSP- $d_4$ (9H) | $[\text{GC}]_{\text{in}}$ | $[\text{PLL}]_{\text{in}}$ | $[\text{GC}]_{\text{f}}$ | $[\text{PLL}]_{\text{f}}$ | $\text{GC}_{\text{f/in}}$        | $\text{PLL}_{\text{f/in}}$ | $\text{GC}_{\text{in}}/\text{PLL}_{\text{in}}$ | $\text{GC}_{\text{f}}/\text{PLL}_{\text{f}}$ | $[\text{COOH}]/[\text{NH}_2]$ |
| $\text{H}_2\text{O}$ | 0.14      | 0.05      | 1                | 5.4                       | 1                          | 3.7                      | 0.065                     | 70                               | 6.5                        | 5.4                                            | 57                                           | 2.8                           |
| DMEM                 | 0.09      | 0.03      | 1                | 5.4                       | 1                          | 2.4                      | 0.04                      | 45                               | 4                          | 5.4                                            | 60                                           | 3                             |

UV-Vis

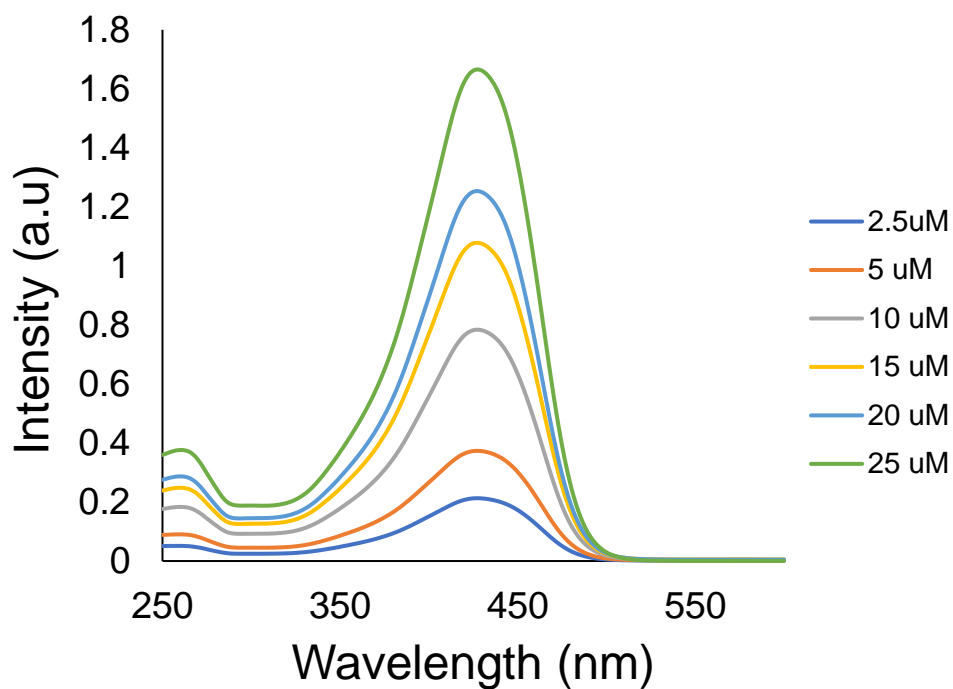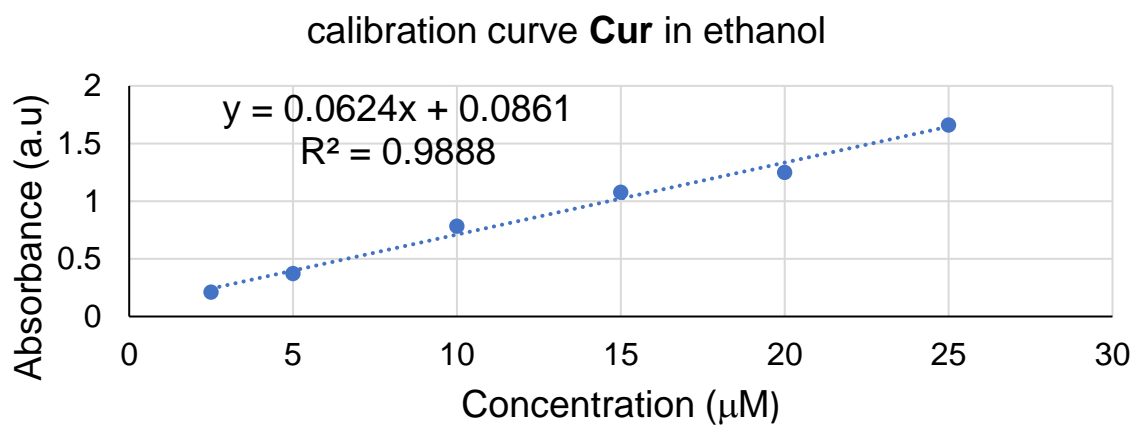

Figure S5. UV-Vis spectra of the calibration curve of *Cur* in ethanol.

*Fluorescence Microscopy*

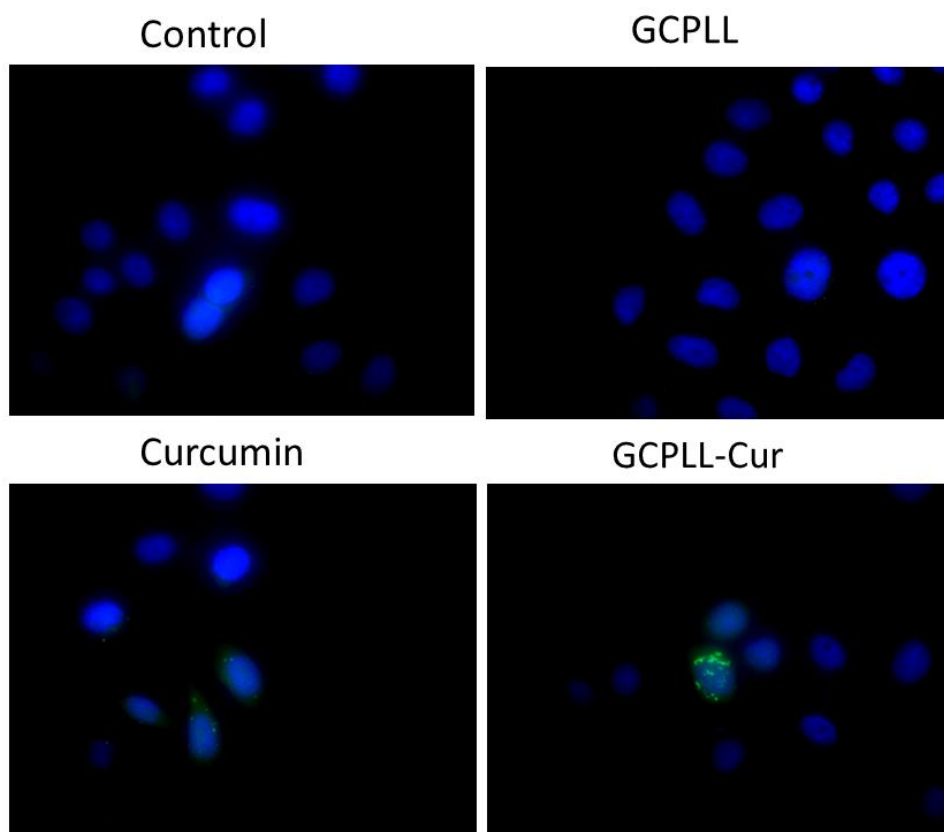

**Figure S6. Fluorescence microscopy of HeLa cells stained with DAPI for nucleus.**

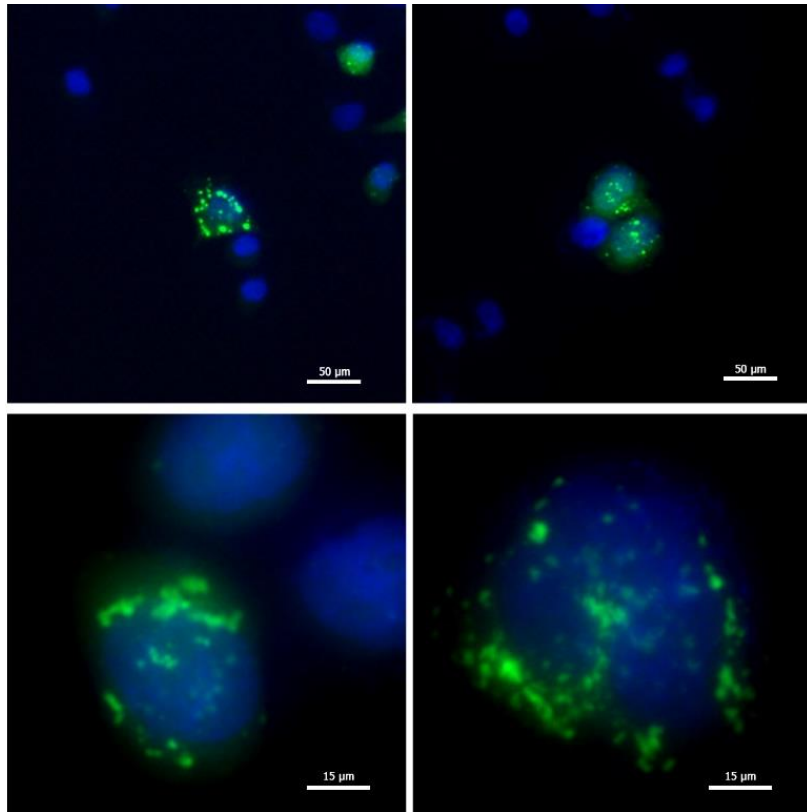

**Figure S7.** Fluorescence microscopy images of HeLa cells stained with DAPI for nucleus after incubation with GCPLL-*Cur* MLWVs. *Cur* is in green.
